# Supplementary material for: Extraction of Silicon-Containing Nanoparticles from an Agricultural Soil for Analysis by Single Particle Sector Field and Time-of-Flight Inductively Coupled Plasma Mass Spectrometry
Source: MDPI journal article supplement (doi:10.3390/nano13142049), 2023-07-11
Supplement: s1 [file s1]

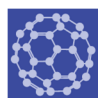

Supporting material for

# Extraction of silicon-containing nanoparticles from an agricultural soil for analysis by single particle sector field and time-of-flight inductively coupled plasma mass spectrometry

Zhizhong Li <sup>1</sup>, Madjid Hadioui <sup>1</sup>, Kevin J. Wilkinson <sup>1,\*</sup>

<sup>1</sup> Department of Chemistry, Université de Montréal, 1375 Ave. Thérèse-Lavoie-Roux  
Montreal, QC, H2V 0B3;

\* Correspondence: kj.wilkinson@umontreal.ca

## List of tables:

- **Table S1.** Physicochemical parameters of the McGill MacDonald College soil sample.
- **Table S2.** Results comparing the signal: noise (S/N) of the quartz and alumina torches in wet and dry mode of the instrument. Also, two types of polypropylene tubes (PP and DigiTube) were tested for Si contamination. S/N were determined for 10  $\mu\text{g L}^{-1}$  of a Si solution in 2%  $\text{HNO}_3$ . Signal intensities were determined for  $^{28}\text{Si}$  using the medium resolution (2500) of instrument.
- **Table S3.** Percentage of Si-containing NPs below different size cut-offs for the different extractants.
- **Table S4.** Results for DLS (dynamic light scattering) of the extracted NP. All of the extractants were adjusted to pH 6.0 before mixing them with a suspension of  $\text{SiO}_2$  NP or the soil.  $\text{SiO}_2$  NP suspensions were diluted to 100 ppm using the extractant, while the soil was extracted for 18 h at 30 rpm and then diluted 10 times in the extractant before analysis, except for the  $\text{Ca}(\text{NO}_3)_2$  extractant, which wasn't diluted. MQW= Milli-Q water.

## List of figures:

- **Figure S1.** (a) Signal intensity distribution of the suspension of 30 nm ultra-uniform gold nanoparticles used for transport efficiency determination and (b) particle size distribution of the 50 nm Au NP standard that was analyzed for quality control.
- **Figure S2.** Magnet scan of  $^{28}\text{Si}$  at medium resolution (2500). Concentration of Si was 20  $\mu\text{g L}^{-1}$ .
- **Figure S3.** Time-resolved signal for (a) a suspension of engineered  $\text{SiO}_2$  nanoparticles (80 nm nominal diameter) and (c) a soil leachate. Time-resolved signal of a small peak of  $\text{SiO}_2$  nanoparticle for (b) the suspension of engineered  $\text{SiO}_2$  nanoparticles (44.6 nm) and (d) the soil leachate (39.7 nm). The soil leachate was obtained using Milli-Q water as the extraction solution. The dwell time used was 40  $\mu\text{s}$ .
- **Figure S4.** Example of external  $^{28}\text{Si}$  calibration curve (ionic standard) used to determine Si mass (particulate and dissolved).
- **Figure S5.** Particle size distribution of Si-containing NPs in the soil leachates obtained using different extractants: (a)  $\text{Ca}(\text{NO}_3)_2$  (5 mmol  $\text{L}^{-1}$ ), (b)  $\text{BaCl}_2$  (5 mmol  $\text{L}^{-1}$ ), (c)  $\text{Mg}(\text{NO}_3)_2$  (5 mmol  $\text{L}^{-1}$ ), (d) Milli-Q water, (e)  $\text{NaNO}_3$  (5 mmol  $\text{L}^{-1}$ ), (f)  $\text{Na}_2\text{H}_2\text{EDTA}$  (0.1 mmol  $\text{L}^{-1}$ ), (g) FA (40 mg  $\text{L}^{-1}$ ) and (h)  $\text{Na}_4\text{P}_2\text{O}_7$  (5 mmol  $\text{L}^{-1}$ ). The pH was adjusted to 6.0 for all extraction solutions prior to contact with the soil. The leachates were diluted 40000 times prior to SP-ICP-MS analysis, except in the case of the  $\text{Na}_4\text{P}_2\text{O}_7$  for which a dilution factor of 250000 times was necessary. Particle sizes correspond to equivalent diameters calculated under the assumption that the NP are spherical  $\text{SiO}_2$ .
- **Figure S6.** Raw data for SP ICP-MS analysis of  $^{28}\text{Si}$  in a) Milli-Q water, b) solution of 40 mM  $\text{Na}_4\text{P}_2\text{O}_7$  that was diluted 250000 times prior to analysis, c) soil leachate obtained using Milli-Q water and diluted (250000x), and d) soil leachate obtained with 40 mM  $\text{Na}_4\text{P}_2\text{O}_7$  and diluted (250000x). All dilutions were performed using Milli-Q water.
- **Figure S7.** (a, b, c) size and (d, e, f) concentration of Si-containing NPs in the extraction solutions of a soil that was in contact (18 hours) with different concentrations of different extractants: (a, d)  $\text{Ca}(\text{NO}_3)_2$ , (b, e)  $\text{NaNO}_3$ , and (c, f) FA. The concentration of 0 in the extraction solutions represents an extraction using Milli-Q water. Particle sizes correspond to equivalent diameters calculated under the assumption that the NP are spherical  $\text{SiO}_2$ .

- **Figure S8.** Particle size distribution of Si-containing NPs extracted from the soil using Milli-Q water, which were then suspended in different media: (a)  $\text{Ca}(\text{NO}_3)_2$  (5 mmol  $\text{L}^{-1}$ ), (b)  $\text{BaCl}_2$  (5 mmol  $\text{L}^{-1}$ ), (c) Milli-Q water, (d)  $\text{Na}_2\text{H}_2\text{EDTA}$  (0.1 mmol  $\text{L}^{-1}$ ) or (e)  $\text{Na}_4\text{P}_2\text{O}_7$  (5 mmol  $\text{L}^{-1}$ ). (f) Polynomial fitting the particle size histograms. The leachates were diluted 100000 times prior to SP-ICP-MS analysis. Particle sizes correspond to equivalent diameters calculated under the assumption that the NP are spherical  $\text{SiO}_2$ . 43 44 45 46 47
- **Figure S9.** (a) Average diameters and (b) concentration of Si-containing NPs extracted from the soil using Milli-Q water, which were then suspended in different media:  $\text{Ca}(\text{NO}_3)_2$  (5 mmol  $\text{L}^{-1}$ ),  $\text{BaCl}_2$  (5 mmol  $\text{L}^{-1}$ ),  $\text{Na}_4\text{P}_2\text{O}_7$  (5 mmol  $\text{L}^{-1}$ ) or  $\text{Na}_2\text{H}_2\text{EDTA}$  (0.1 mmol  $\text{L}^{-1}$ ). Particle sizes correspond to equivalent diameters calculated under the assumption that the NP are spherical  $\text{SiO}_2$ . 48 49 50 51
- **Figure S10.** Proportion of each Si particle type detected in the soil leachate using pure water as the extractant and SP TOF-ICP-MS for detection. Leachates were diluted 100000 times prior to analysis. 854 particles were detected during an acquisition time of 92 s. A dwell time of 76.8  $\mu\text{s}$  was employed. 52 53 54 55 56

**Table S2.** Physicochemical parameters of the McGill MacDonald College soil sample [1]

| Physicochemical parameter                                |      |
|----------------------------------------------------------|------|
| pH <sup>a</sup>                                          | 7.2  |
| Organic matter (%)                                       | 6.1  |
| P (mg kg <sup>-1</sup> )                                 | 183  |
| Ca (mg kg <sup>-1</sup> )                                | 3999 |
| Mg (mg kg <sup>-1</sup> )                                | 325  |
| K (mg kg <sup>-1</sup> )                                 | 349  |
| Al (mg kg <sup>-1</sup> )                                | 717  |
| N (NO <sub>3</sub> <sup>-</sup> ) (mg kg <sup>-1</sup> ) | 6.4  |
| N (NH <sub>4</sub> <sup>+</sup> ) (mg kg <sup>-1</sup> ) | 2.5  |

<sup>a</sup> A 1:1 (w/v) solution of soil to water was shaken for 30 min, then left to rest for 1 hour.

**Table S2.** Results comparing the signal: noise (S/N) of the quartz and alumina torches in wet and dry mode of the instrument. Also, two types of polypropylene tubes (PP and DigiTube) were tested for contamination for Si. S/N were given for 10 ug L<sup>-1</sup> of a Si solution in 2% HNO<sub>3</sub>. Signal intensities were determined for <sup>28</sup>Si using the medium resolution of instrument.

|          | S/N          |       |               | Signal (x 10 <sup>4</sup> cps) |       |           |
|----------|--------------|-------|---------------|--------------------------------|-------|-----------|
|          | Quartz torch |       | Alumina torch | PP tube                        |       | Digi tube |
| Wet mode | 6.7          | ± 2.6 | 4.0 ± 1.5     | 20.8                           | ± 2.2 | 6.7 ± 0.1 |
| Dry mode | 1.1          | ± 0.1 | 1.09 ± 0.02   |                                |       |           |

**Table S3.** Percentage of Si-containing NPs below different size cut-offs for the different extractants.

| Extractant                                    | NPs<70nm (%) |       |  | NPs<80nm (%) |       |  | NPs<90nm (%) |       |  | NPs<100nm (%) |       |  |
|-----------------------------------------------|--------------|-------|--|--------------|-------|--|--------------|-------|--|---------------|-------|--|
| Ca(NO <sub>3</sub> ) <sub>2</sub>             | 17.5         | ± 0.9 |  | 32.1         | ± 2.6 |  | 45.0         | ± 4.7 |  | 54.7          | ± 4.4 |  |
| Mg(NO <sub>3</sub> ) <sub>2</sub>             | 13.2         | ± 1.9 |  | 28.8         | ± 1.4 |  | 39.6         | ± 1.6 |  | 48.2          | ± 0.6 |  |
| BaCl <sub>2</sub>                             | 17.1         | ± 2.2 |  | 36.4         | ± 4.8 |  | 49.0         | ± 4.1 |  | 59.2          | ± 2.9 |  |
| NaNO <sub>3</sub>                             | 19.8         | ± 0.6 |  | 38.5         | ± 0.8 |  | 53.2         | ± 1.1 |  | 64.0          | ± 0.9 |  |
| MQW                                           | 21.5         | ± 0.9 |  | 40.9         | ± 1.0 |  | 55.4         | ± 0.9 |  | 66.6          | ± 0.6 |  |
| FA                                            | 20.2         | ± 0.9 |  | 39.5         | ± 0.9 |  | 54.0         | ± 0.9 |  | 64.8          | ± 0.7 |  |
| EDTA                                          | 20.8         | ± 1.0 |  | 40.0         | ± 1.3 |  | 54.5         | ± 1.3 |  | 65.1          | ± 1.4 |  |
| Na <sub>4</sub> P <sub>2</sub> O <sub>7</sub> | 26.2         | ± 0.7 |  | 48.1         | ± 0.7 |  | 63.0         | ± 0.9 |  | 73.7          | ± 0.7 |  |

**Table S4.** Results for DLS (dynamic light scattering) of the extracted NP. All of the extractants were adjusted to pH 6.0 before mixing with the suspension of SiO<sub>2</sub> nanoparticles or the soil. The SiO<sub>2</sub> NP suspension was diluted to 100 ppm using the extractant, while the soil was extracted for 18 h at 30 rpm and then diluted 10 times using the extractant before analysis, except for the Ca(NO<sub>3</sub>)<sub>2</sub>, which wasn't diluted. MQW= Milli-Q water.

|                                            | Extractant                                    | Zeta Potential (mV) |    | Diameter (nm) |    |
|--------------------------------------------|-----------------------------------------------|---------------------|----|---------------|----|
|                                            |                                               | Mean                | SD | Mean          | SD |
| SiO <sub>2</sub> nanoparticles<br>(80 nm)  | MQW                                           | -32.6 ± 2.0         |    | 87.0 ± 0.7    |    |
|                                            | Ca(NO <sub>3</sub> ) <sub>2</sub>             | -18.0 ± 0.4         |    | 86.9 ± 8.9    |    |
|                                            | Na <sub>4</sub> P <sub>2</sub> O <sub>7</sub> | -27.4 ± 2.8         |    | 88.7 ± 7.6    |    |
|                                            | Fulvic acid                                   | -44.2 ± 4.2         |    | 84.9 ± 0.6    |    |
| SiO <sub>2</sub> nanoparticles<br>(200 nm) | MQW                                           | -43.4 ± 3.0         |    | 203.2 ± 1.6   |    |
|                                            | Ca(NO <sub>3</sub> ) <sub>2</sub>             | -23.1 ± 2.0         |    | 199.1 ± 2.2   |    |
|                                            | Na <sub>4</sub> P <sub>2</sub> O <sub>7</sub> | -33.5 ± 1.3         |    | 199.7 ± 0.9   |    |
|                                            | Fulvic acid                                   | -49.1 ± 2.7         |    | 201.5 ± 2.4   |    |
| Extracted soil nanoparticles               | MQW                                           | -17.1 ± 1.0         |    | 243.4 ± 2.5   |    |
|                                            | Ca(NO <sub>3</sub> ) <sub>2</sub>             | -12.6 ± 0.2         |    | 792.4 ± 46.4  |    |
|                                            | Na <sub>4</sub> P <sub>2</sub> O <sub>7</sub> | -35.0 ± 0.7         |    | 213.3 ± 2.0   |    |
|                                            | Fulvic acid                                   | -23.9 ± 0.5         |    | 254.8 ± 5.0   |    |

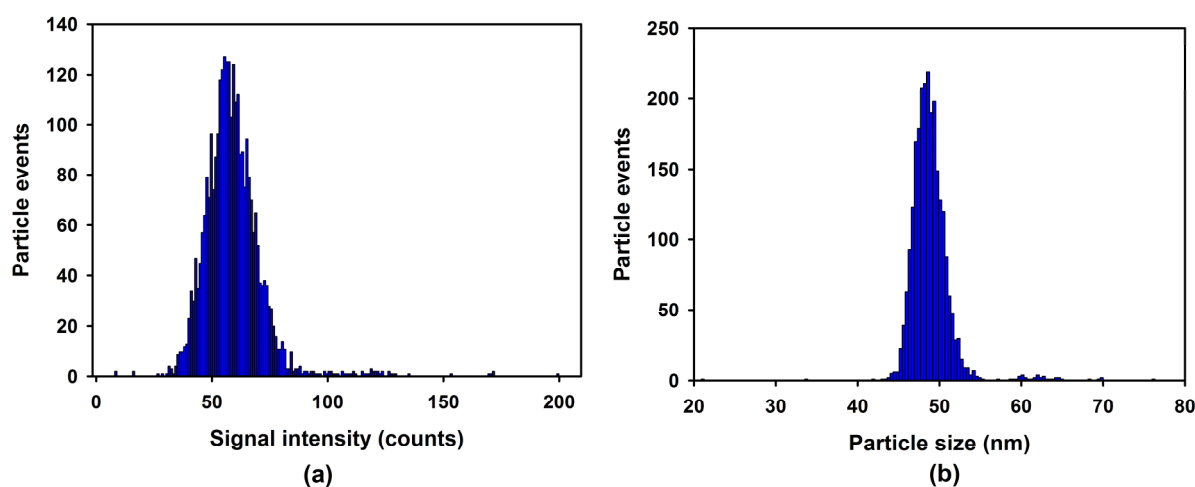

**Figure S1.** Measured particle distributions of the ultra-uniform gold nanoparticles for the (a) 30 nm and (b) 50 nm standard NP.

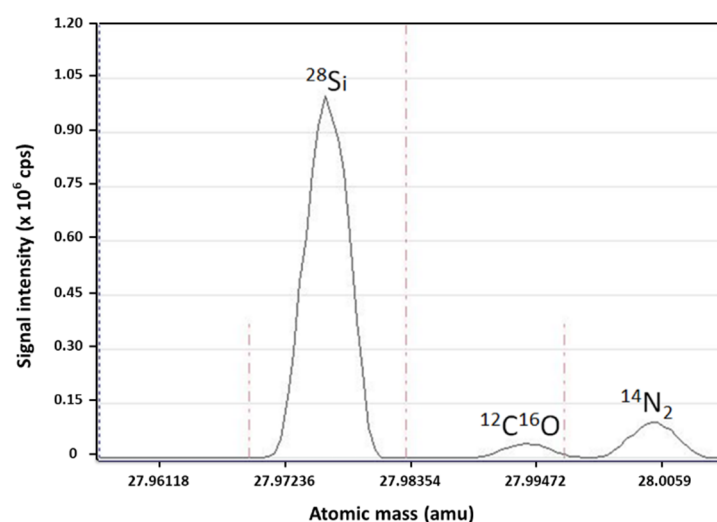

**Figure S2.** Magnet scan of  $^{28}\text{Si}$  at medium resolution (2500). Si concentration was  $20 \mu\text{g L}^{-1}$ .

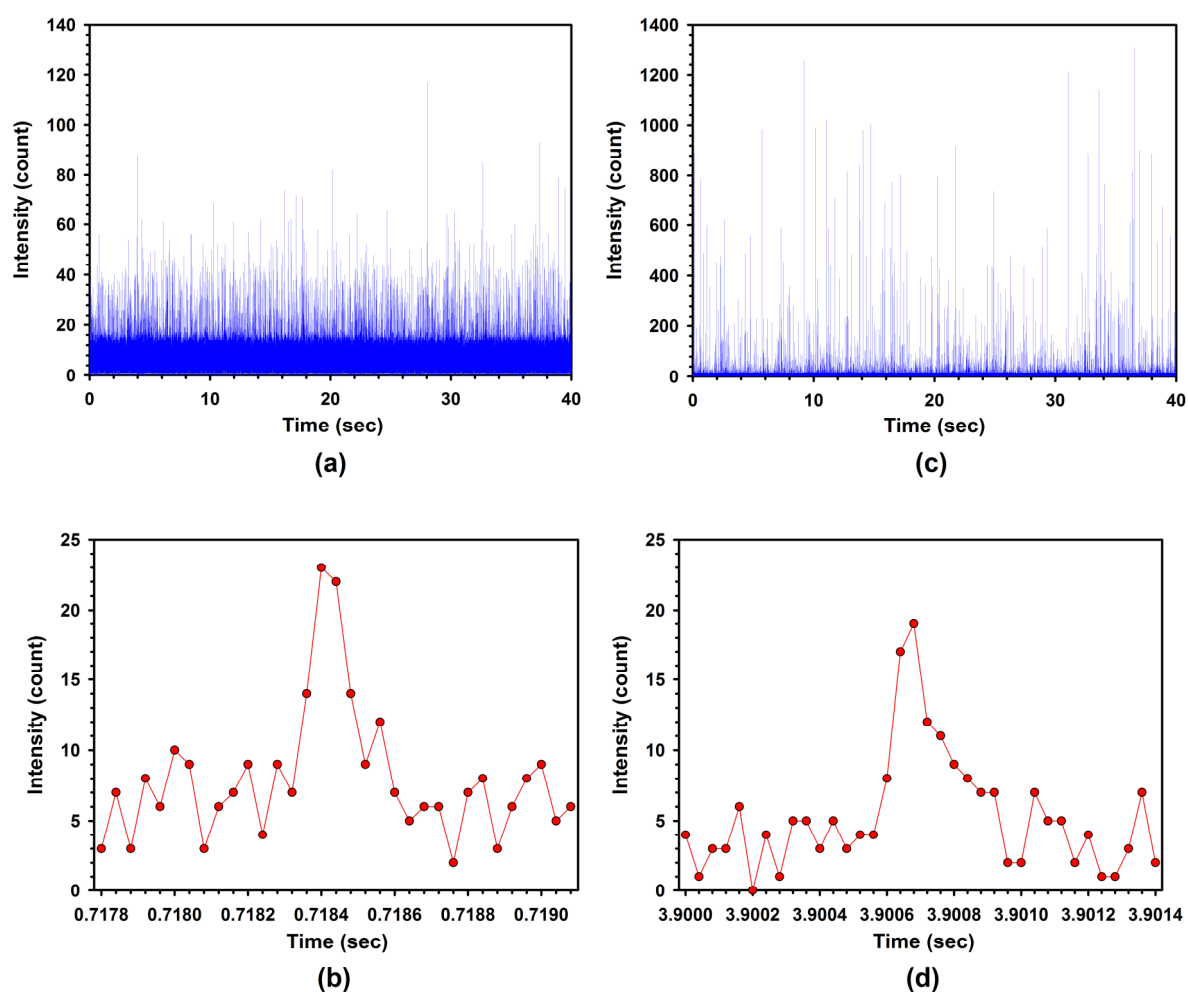

**Figure S3.** Time-resolved signal for (a) a suspension of engineered  $\text{SiO}_2$  nanoparticles (80 nm nominal diameter) and (c) a soil leachate. Time-resolved signal of a small peak of  $\text{SiO}_2$  nanoparticle for (b) the suspension of engineered  $\text{SiO}_2$  nanoparticles (44.6 nm) and (d) the soil leachate (39.7 nm). The soil leachate was obtained using Milli-Q water as the extraction solution. The dwell time was 40  $\mu\text{s}$ .

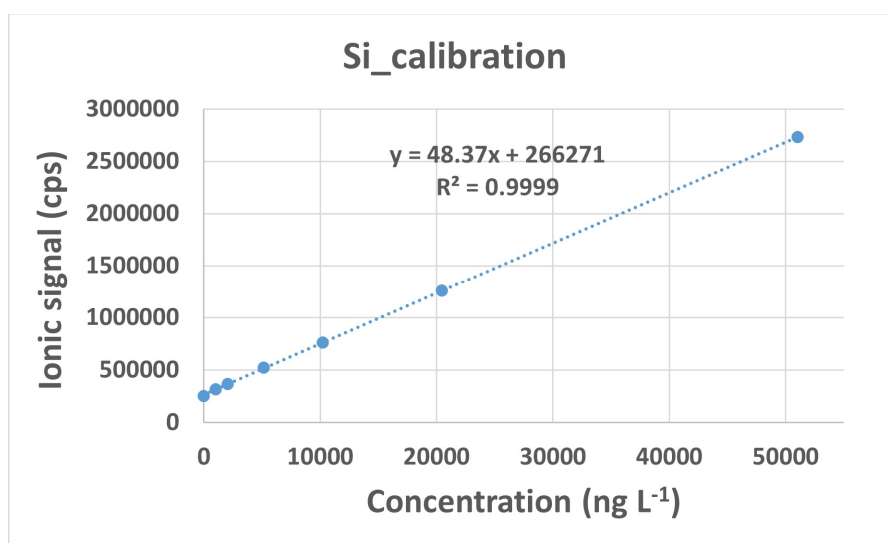

Figure S4. Example of external <sup>28</sup>Si calibration curve (ionic standard) used to determine Si mass (particulate and dissolved).

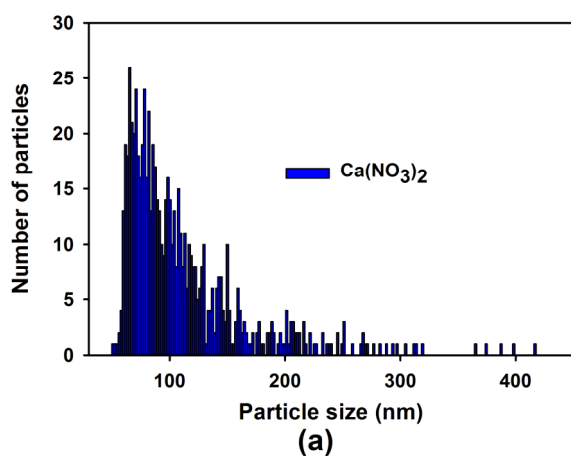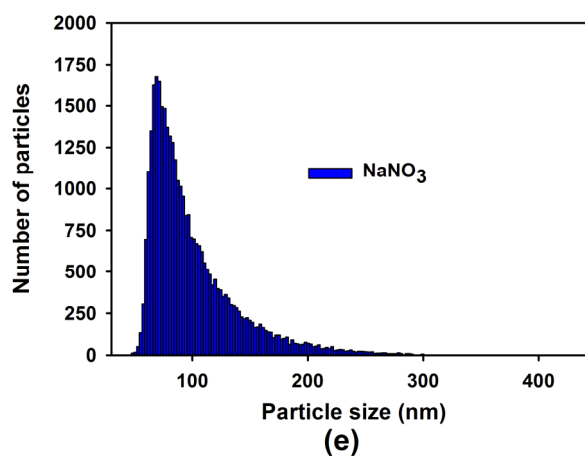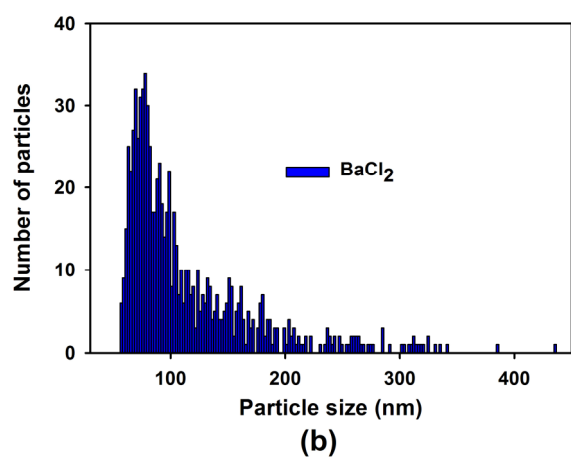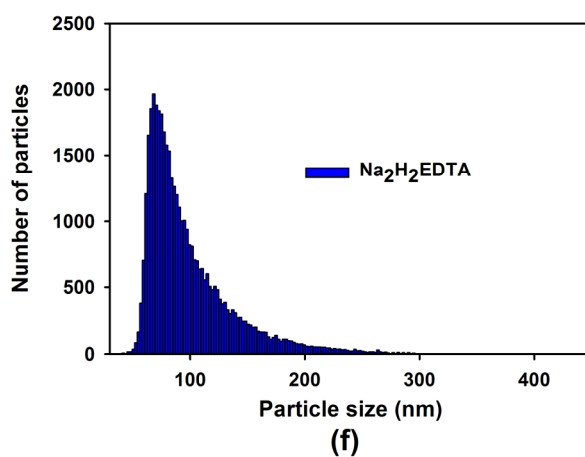

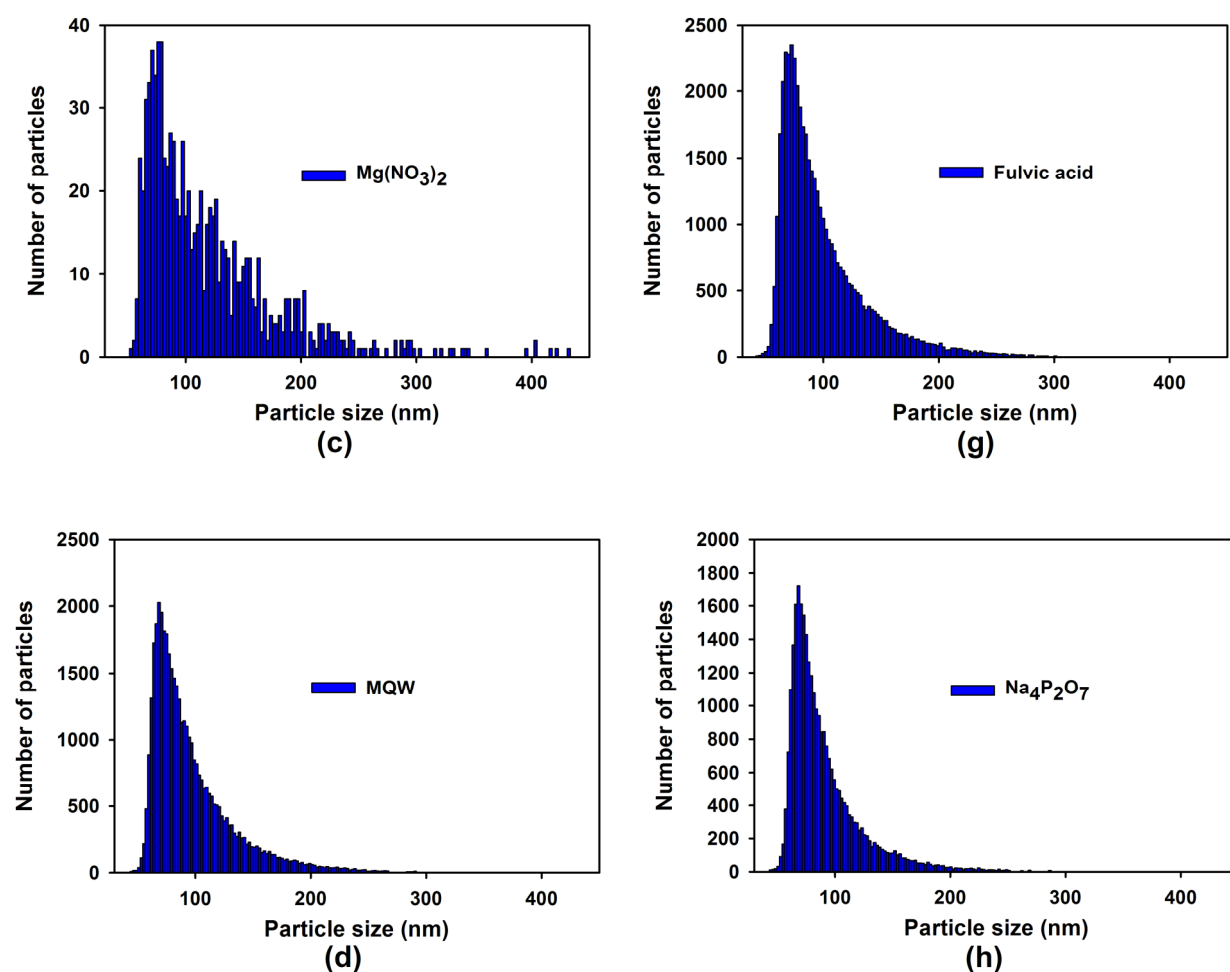

**Figure S5.** Particle size distribution of Si-containing NPs in the soil leachates obtained using different extractants: (a)  $\text{Ca}(\text{NO}_3)_2$  (5 mmol L<sup>-1</sup>), (b)  $\text{BaCl}_2$  (5 mmol L<sup>-1</sup>), (c)  $\text{Mg}(\text{NO}_3)_2$  (5 mmol L<sup>-1</sup>), (d) Milli-Q water, (e)  $\text{NaNO}_3$  (5 mmol L<sup>-1</sup>), (f)  $\text{Na}_2\text{H}_2\text{EDTA}$  (0.1 mmol L<sup>-1</sup>), (g) FA (40 mg L<sup>-1</sup>) and (h)  $\text{Na}_4\text{P}_2\text{O}_7$  (5 mmol L<sup>-1</sup>). The pH was adjusted to 6.0 for all extraction solutions prior to contact with the soil. The leachates were diluted 40000 times prior to SP-ICP-MS analysis, except in the case of  $\text{Na}_4\text{P}_2\text{O}_7$  for which a dilution factor of 250000 times was necessary. Particle sizes correspond to equivalent diameters calculated under the assumption that the NP are spherical  $\text{SiO}_2$ .

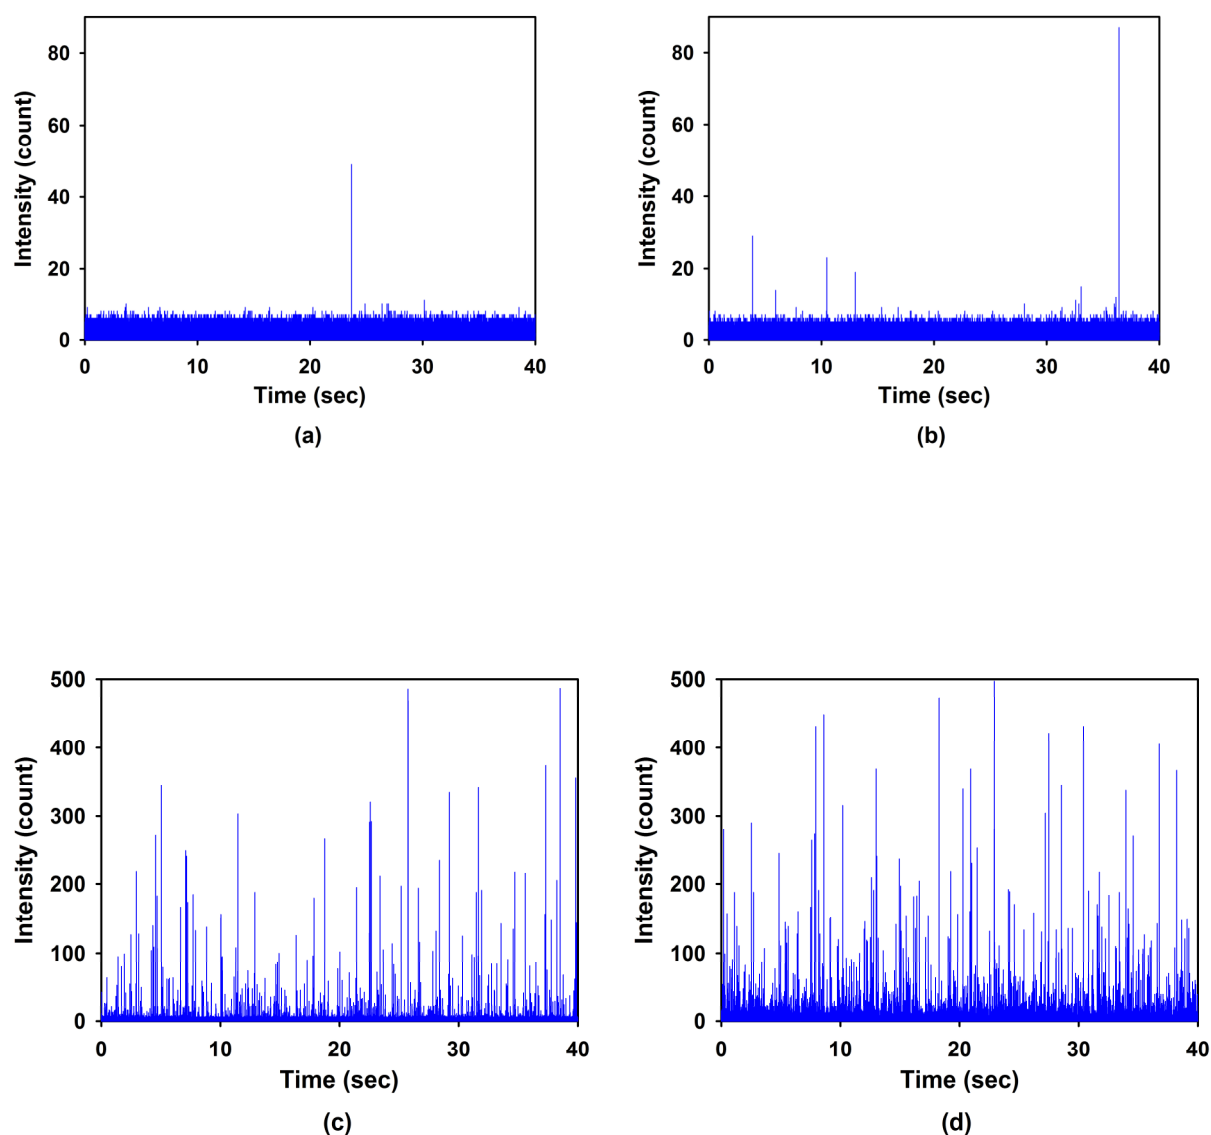

**Figure S6.** Raw data for SP ICP-MS analysis of  $^{28}\text{Si}$  in a) Milli-Q water, b) solution of 40 mM  $\text{Na}_4\text{P}_2\text{O}_7$  that was diluted 250000 times prior to analysis, c) diluted (250000x) soil leachate obtained using Milli-Q water, and d) diluted (250000x) soil leachate obtained with 40 mM  $\text{Na}_4\text{P}_2\text{O}_7$ . All dilutions were done with Milli-Q water.



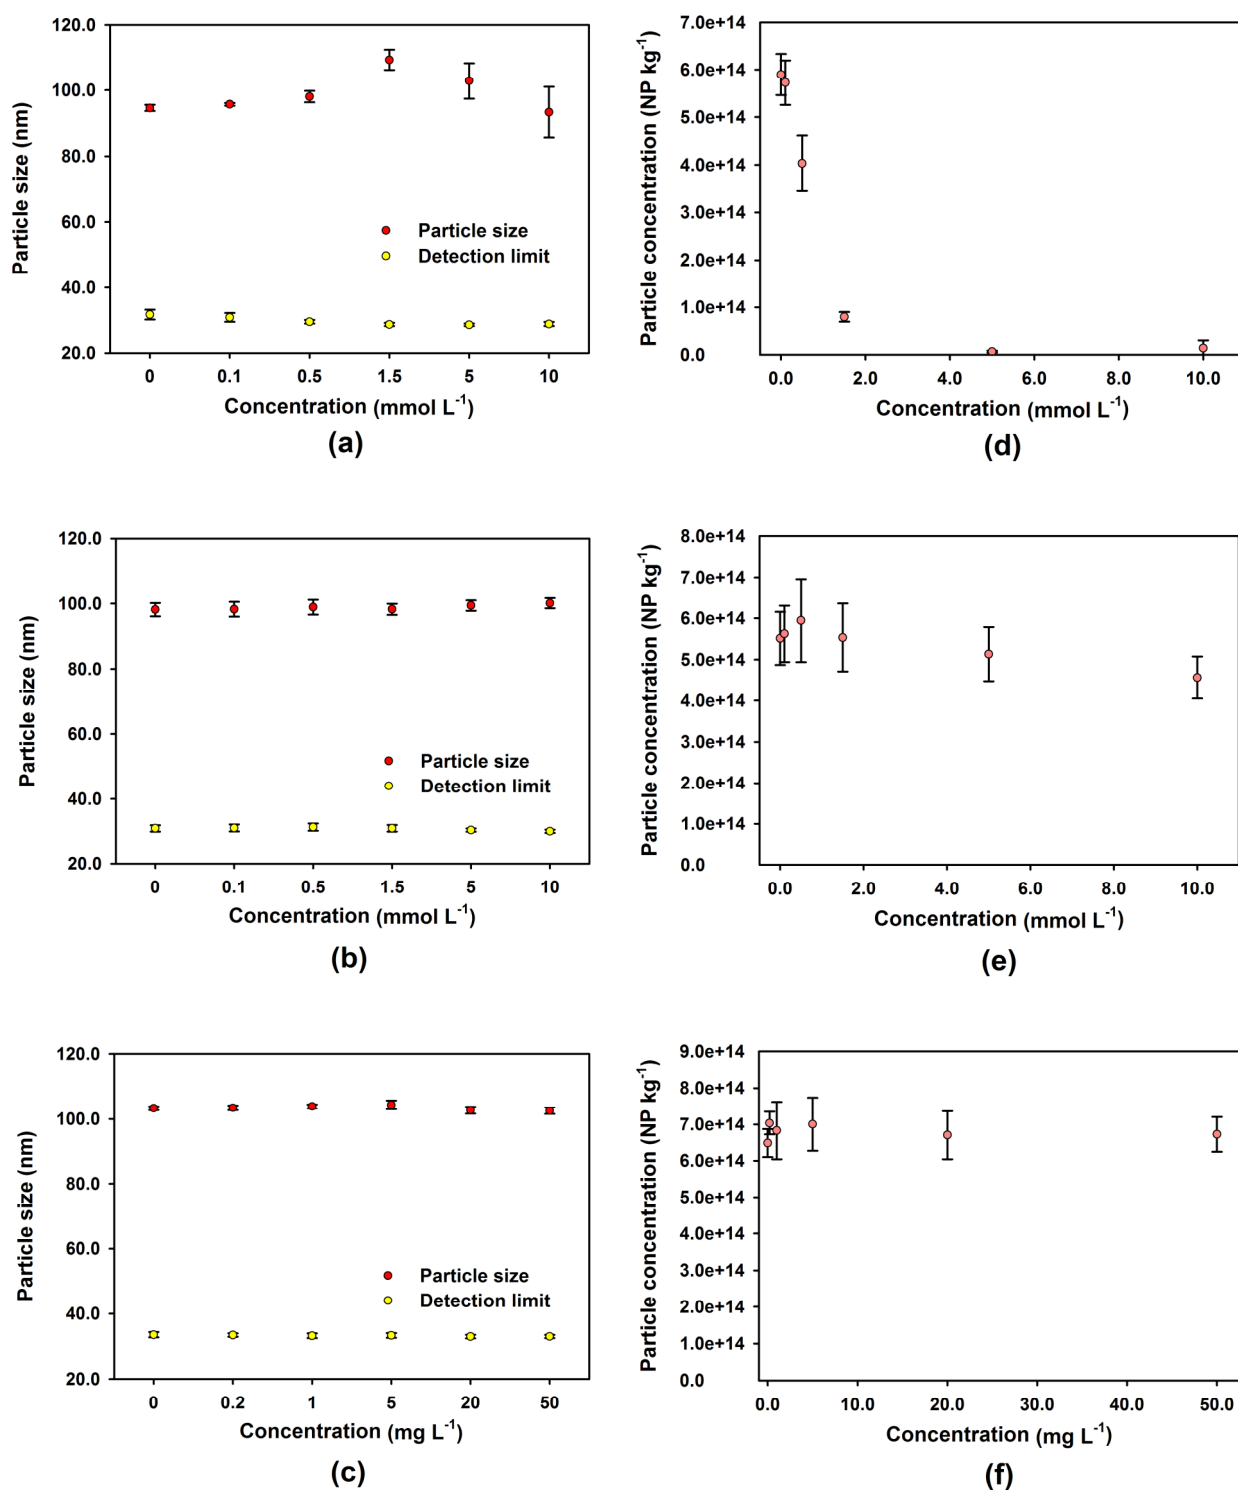

**Figure S7.** (a, b, c) size and (d, e, f) concentration of Si-containing NPs in the extraction solutions of a soil in contact (18 hours) with different extractants as a function of the concentration of (a, d)  $\text{Ca}(\text{NO}_3)_2$ , (b, e)  $\text{NaNO}_3$ , and (c, f) FA. The concentration of 0 represents the initial extraction using Milli-Q water. Particle sizes correspond to equivalent diameters calculated under the assumption that the NP are spherical  $\text{SiO}_2$ .

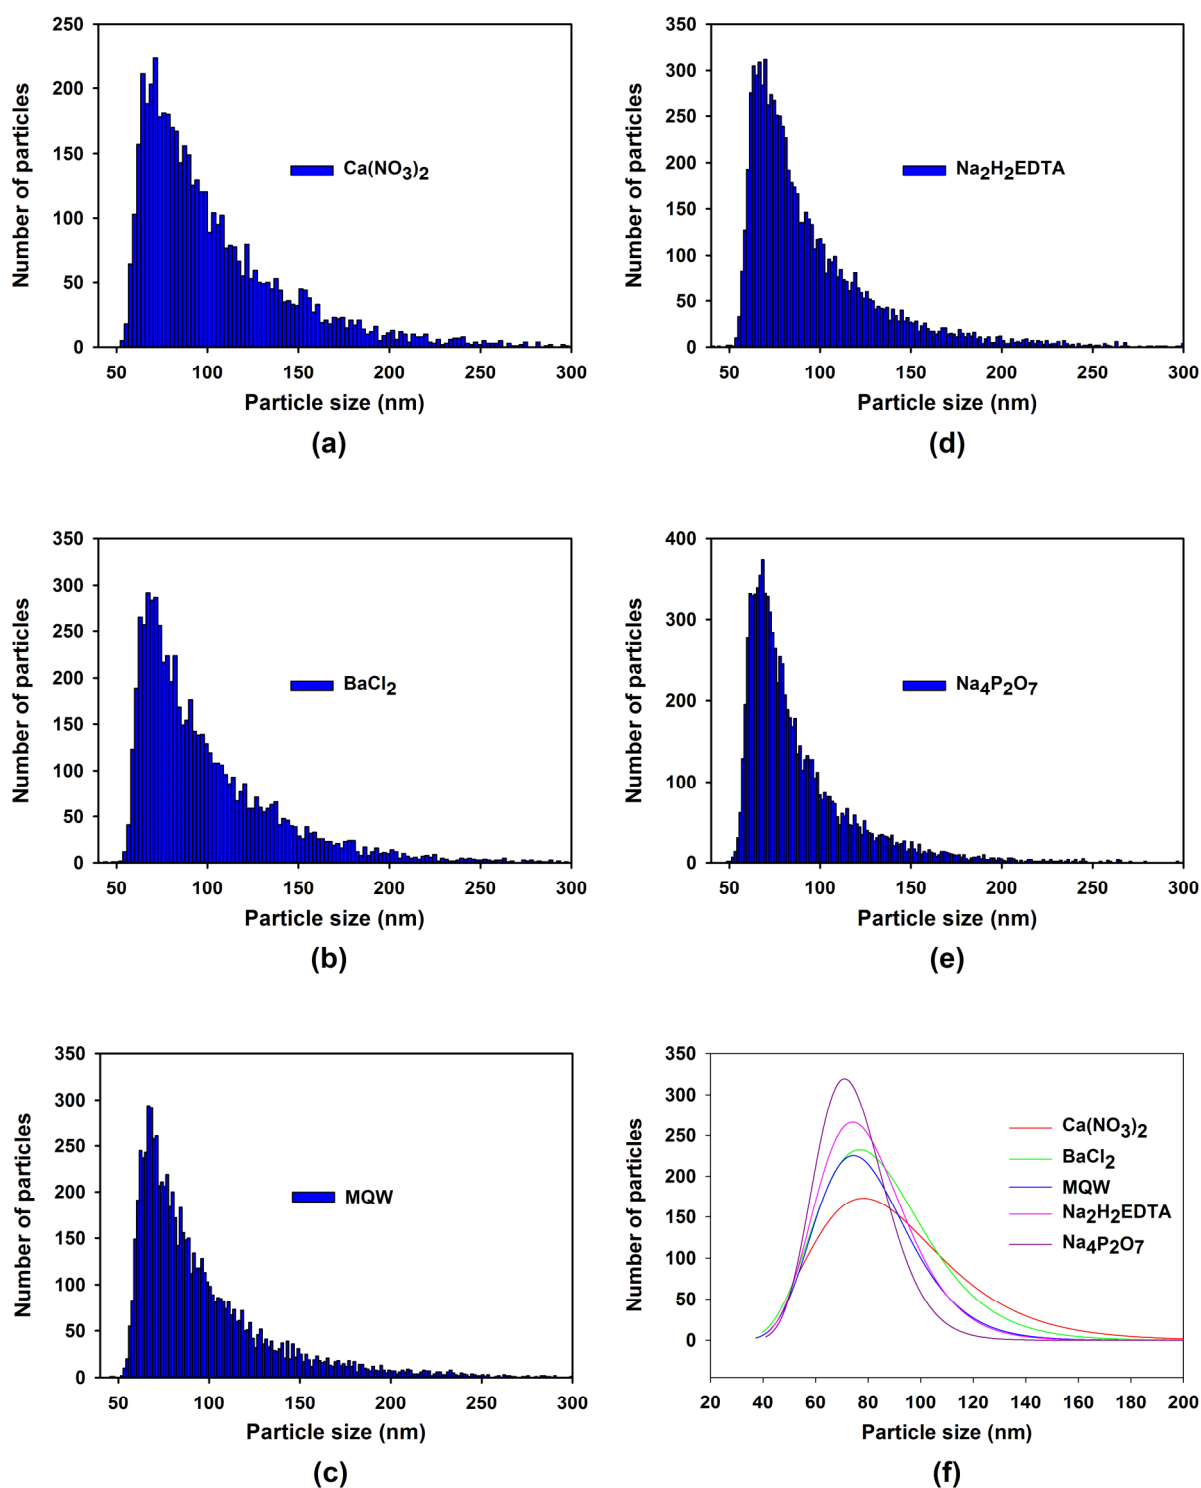

**Figure S8.** Particle size distribution of Si-containing NPs extracted from the soil using Milli-Q water, which were then suspended in different media: (a)  $\text{Ca}(\text{NO}_3)_2$  (5 mmol  $\text{L}^{-1}$ ), (b)  $\text{BaCl}_2$  (5 mmol  $\text{L}^{-1}$ ), (c) Milli-Q water, (d)  $\text{Na}_2\text{H}_2\text{EDTA}$  (0.1 mmol  $\text{L}^{-1}$ ) or (e)  $\text{Na}_4\text{P}_2\text{O}_7$  (5 mmol  $\text{L}^{-1}$ ). (f) Polynomial fitting the particle size histograms. The leachates were diluted 100000 times prior to SP-ICP-MS analysis. Particle sizes correspond to equivalent diameters calculated under the assumption that the NP are spherical  $\text{SiO}_2$ .

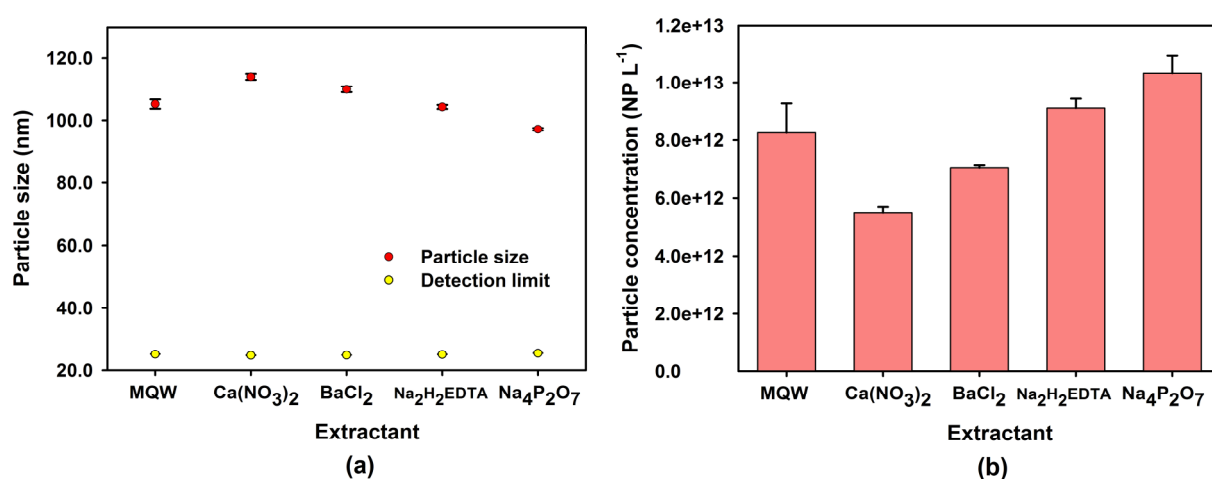

**Figure S9.** (a) Average size and (b) concentration of Si-containing NPs extracted from the soil using Milli-Q water, which were then suspended in different media: Ca(NO<sub>3</sub>)<sub>2</sub> (5 mmol L<sup>-1</sup>), BaCl<sub>2</sub> (5 mmol L<sup>-1</sup>), Na<sub>4</sub>P<sub>2</sub>O<sub>7</sub> (5 mmol L<sup>-1</sup>) or Na<sub>2</sub>H<sub>2</sub>EDTA (0.1 mmol L<sup>-1</sup>). Particle sizes correspond to equivalent diameters calculated under the assumption that the NP are spherical SiO<sub>2</sub>.

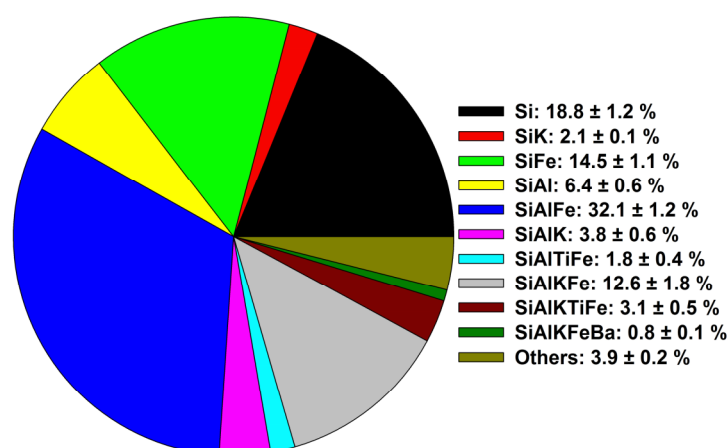

**Figure S10.** Proportion of each Si particle type detected in the soil leachate using pure water as the extractant and SP TOF-ICP-MS for detection. Leachates were diluted 100000 times prior to analysis. 854 particles were detected during an acquisition time of 92 sec. A dwell time of 76.8 μsec was employed.

## References

- Galhardi, J.A.; Wang, P.Y.; Bueno, V.; Ghoshal, S.; Gravel, V.; Wilkinson, K.J.; Bayen, S. Field evaluation of the potential effects of polymer and silica-based nanopesticides on strawberries and agricultural soils. *Environmental Science-Nano* **2022**, *9*, 3833–3843, doi:10.1039/d2en00329e.
